# Supplementary material
Source: ML conference proceedings conference paper supplement (https://openaccess.thecvf.com/content/CVPR2022/html/Simpson_Learning_Structured_Gaussians_CVPR_2022_paper.html)
Supplement: Supplementary file 3 [file Simpson_Learning_Structured_Gaussians_CVPR_2022_supplemental.zip]

Archive with 4 entries (4 files):
- 08877-supp.pdf
- __MACOSX/._08877-supp.pdf
- paper_8877_video.mp4
- __MACOSX/._paper_8877_video.mp4
